1  
2  
3  
4  
5  
6  
7  
8  
9  
10  
11  
12  
13  
14  
15  
16  
17  
18  
19  
20  
21  
22  
23  
24  
25  
26  
27  
28  
29  
30  
31

**Infectious DNA clone technology and inoculation strategy for Rose Rosette Virus that includes all seven segments of the negative-strand RNA genome.**

Mingxiong Pang<sup>a</sup>, Mathieu Gayral<sup>a</sup>, Kelsey Lyle<sup>c</sup>, Madalyn K. Shires<sup>d</sup>, Kevin Ong<sup>d</sup>, David Byrne<sup>b</sup>, Jeanmarie Verchot<sup>a1</sup>

<sup>a</sup>Texas A&M Agrilife Center in Dallas, 17360Coit Rd, Dallas TX 75252

<sup>b</sup>Department of Horticulture Sciences, Texas A&M University, College Station, TX 77843

Department of Biological Sciences, University of Texas at Dallas, Dallas TX 75252

<sup>d</sup>Department of Plant Pathology & Microbiology, Texas A&M University, College Station, TX 77843

<sup>1</sup> corresponding author: Jeanmarie Verchot, Texas A&M Agrilife Center in Dallas, 1736 Coit Rd, Dallas TX 75252 phone: 972-952-9224; email: [jm.verchot@ag.tamu.edu](mailto:jm.verchot@ag.tamu.edu)

Author Contributions: MP, DB, JV designed research; MP, KL, MS performed research; MP, DB, KO, MG, and JV analyzed data; MP, DB, MG, KO and JV wrote the paper.

Keywords: Reverse genetic system, Emaravirus, plant virus, infectious clone,

The authors declare no conflict of interest

## 32 **Abstract**

33 The ability to mutate the genomic nucleic acid of viruses is the most straight-forward approach  
34 to understanding virus genetics. Reverse genetics of RNA viruses involves the introduction of  
35 mutations at the cDNA level, and then introducing cDNAs into cells to produce infectious  
36 progeny virus. Reverse genetic tools are used to investigate the products of viral genes, virus-  
37 host interactions relating to pathogenicity and immunity, and requirements for vector  
38 transmission. The technology has been slow to develop for viruses with negative strand RNA  
39 genomes and has been especially difficult for plant viruses with multicomponent negative strand  
40 RNA genomes, many of which require an insect vector for transmission to be successful. *Rose*  
41 *rosette virus* (RRV; Emaravirus) is a negative-sense RNA virus with a 7-segmented genome  
42 that is enclosed by a double membrane (1-4). We devised a technology for delivery of plant sap  
43 inoculum which can also deliver agrobacterium containing infectious clones to rose plants. We  
44 report the first reverse genetic system for a member of the Emaravirus genus, Rose rosette  
45 virus (RRV). We introduced fluorescent proteins at three locations in the seven segmented  
46 genome and learned that such reporters can be stably maintained during systemic infection.  
47 This study demonstrates that RRV can infect *Arabidopsis* causing significant growth alterations  
48 of the plant, while causing mild to more serious disease symptoms in *Nicotiana benthamiana*  
49 and two varieties of roses. This reverse genetic system creates new opportunities for studying  
50 negative strand RNA viruses infecting plants.

## 51 **Significant Statement**

52 Since an infectious clone for influenza virus was developed in 1998, little progress has been  
53 made in infectious clone technology for viruses with negative strand genomes. We constructed  
54 an infectious clone of the seven-segmented RRV genome that is contained in a binary vector  
55 and delivered by *Agrobacterium*. RRV has emerged as a serious threat to cultivated roses,  
56 causing millions of dollars in losses to commercial producers. This technology is a game  
57 changer for investigations into Emaravirus genetics, studies of molecular virus-host interactions,  
58 as well as for rose breeders who can use the infectious clone for rapid germplasm screening to  
59 identify useful resistance for breeding programs.

## 60 **INTRODUCTION**

61 Among the most significant technological advances for research into virus life cycles has  
62 been the development of cDNA copies of viral genomes that can be reverse transcribed to  
63 produce infectious virus (5). This technology enables the genetic manipulation of cDNA for  
64 reverse genetic analysis of the virus life cycle, and for investigations into the molecular basis of  
65 virus-host interactions for susceptibility and immunity. The infectious cDNA technology was  
66 rapidly adopted for studying positive strand RNA viruses. Since exact 5' ends are critical for  
67 launching the first round of translation and replication of transcripts to generate infectious virus  
68 genomes, plasmids and infectious cDNA inserts are often combined with bacteriophage T7,

69 SP6, RNA pol I, or RNA pol II promoters fused to the exact 5' end of the virus genomic cDNA  
70 (6-11). Exact 3' ends are also critical and so transcriptional terminators or hepatitis delta virus  
71 ribozymes are often located at the 3' ends to produce transcripts with exact 3' ends (7, 8, 12-  
72 14). The second advance in infectious clone technology was the discovery that genetic  
73 sequences encoding foreign peptides, large proteins, and small noncoding RNAs can be  
74 integrated into specific locations of viral genomes and these recombinant virus clones can be  
75 used as tools for reverse genetics of their hosts, for overexpression of peptides and proteins  
76 that can be purified for vaccine production or other purposes (15-23). Among plant RNA  
77 viruses, green fluorescent protein (GFP) and derivatives, or iLOV genes have been incorporated  
78 into viral genomes (24). Combining visual markers of infection with reverse genetic technology  
79 has been a powerful combination for functional imaging to uncover critical roles for viral proteins  
80 in the virus life cycle. These combined technologies have also been central to discovery of  
81 molecular plant-virus interactions occurring in susceptible hosts or that govern gene-for-gene  
82 resistance.

83 Infectious clone technology has been slower to develop for viruses with negative strand  
84 RNA genomes because the naked genomic or antigenomic RNAs are not able to initiate  
85 infection by themselves. The minimum infectious unit for this type of virus requires a  
86 ribonucleoprotein (RNP) complex composed of viral genomic RNA and RNA dependent RNA  
87 polymerase (P proteins). Among negative strand RNA viruses, the first infectious clones were  
88 produced for viruses with non-segmented genomes belonging to the families *Rhabdoviridae*,  
89 *Paramyxoviridae*, and *Filoviridae* (Ebola) (25-29). Generally, infection is achieved by delivering  
90 viral genomic cDNAs that produce transcripts that function as anti-genomic RNAs (agRNA).  
91 Plasmids encoding the nucleocapsid core or subunits of the viral polymerase are co-delivered  
92 with the agRNA encoding cDNAs that successfully spur the replication process. The first  
93 infectious clone of a negative strand RNA virus that infects plants was *Sonchus yellow net virus*  
94 (SYNV) (6, 7, 25, 30). The SYNV full-length cDNA was introduced into a binary vector fused to  
95 a duplicated Cauliflower mosaic virus 35S promoter. Additional binary plasmids expressing the  
96 N (nucleocapsid) protein, P (phosphoprotein) and L (polymerase) protein are co-delivered with  
97 the viral cDNA plasmid by agroinfiltration to plant leaves to produce active SYNV infection.

98 The first infectious clone of influenza A virus, which has eight genome segments, was  
99 reported in 1999 based on the transfection of *in vitro* constituted RNP complexes (31, 32). The  
100 eight genome segments are produced using a promoter that depends upon the cellular RNA pol  
101 I for synthesis of agRNA alongside four plasmids that expressed proteins required for viral

102 replication and transcription (PB1, PB2, PA, NP). More recent infectious clones have been  
103 developed which consist of several plasmids providing bidirectional expression of viral RNAs  
104 from RNA pol I and pol II promoters for reverse genetic studies in transfected eukaryotic cells  
105 (33).

106 Here we report an infectious clone of *Rose rosette virus* (RRV), a member of the  
107 Emaravirus family that has seven genome segments (34). Roses are the economically most  
108 important ornamental plants belonging to the family *Rosaceae*. RRV has been devastating  
109 roses and the rose industry in the USA, causing millions of dollars in losses (35). Typical  
110 symptoms of RRV include rapid stem elongation, breaking of axillary buds, leaflet deformation  
111 and wrinkling, bright red pigmentation, phyllody, and hyper-thorniness (36, 37). Currently  
112 researchers rely on viruliferous eriophyid mites to deliver RRV to plants, and mechanical  
113 delivery of RRV to test plants has not been demonstrated to be consistently effective. Here we  
114 developed a mechanical delivery method using homogenate inoculum, and this technology can  
115 also be used for delivery of an infectious clone by agrobacterium. To produce infectious clone,  
116 each cDNA is located next to the duplicated CaMV 35S promoter to produce an exact 5' end  
117 and a 3' hepatitis delta virus ribozyme (HDR) to generate an exact 3' end. We successfully  
118 introduced the green fluorescent protein (GFP) and iLOV reporter protein genes in three  
119 locations to determine the best location in the genome for adding new genetic features. This  
120 enhanced visual reporter system for the infectious clone will be useful for screening rose  
121 germplasm stocks for new sources of resistance.

## 122 **Results**

### 123 **Mechanical inoculation of *Arabidopsis thaliana* and *Nicotiana benthamiana* using RRV** 124 **containing naturally infected rose sap**

125 Currently researchers rely on viruliferous eriophyid mites to deliver RRV to plants, and  
126 mechanical delivery of RRV to roses has been described as unreliable. For many viruses that  
127 can only be transmitted by an insect or other type of vector, mechanical inoculation of an  
128 infectious clone cannot be easily achieved. Therefore, a critical step toward developing an  
129 infectious clone was to devise a method for mechanical inoculation of rose plants and we chose  
130 to use naturally infected rose sap for this stage of work. We prepared homogenate inoculum by  
131 grinding leaf tissue from naturally infected roses ('Julia Child') in 0.05 M phosphate buffer (pH  
132 7.0)(1:30 w/v). We added RNase inhibitor and 0.1% volume of Silwet-77 to the extract and  
133 loaded to the reservoir of a pressurized artist airbrush. The soluble leaf homogenate was

134 applied to *Arabidopsis thaliana*, *Nicotiana benthamiana* and roses plants that were dusted with  
135 carborundum (Fig. 1A). The leaves were harvested for diagnostic testing after 6 days, and  
136 plants were generally maintained for up to 60 days to monitor infection.

137 RT-PCR was used to detect the production of RRV transcripts in inoculated leaves, as  
138 evidence that the sap inoculations resulted in productive infection. Diagnostic RT-PCRs  
139 produced the expected size fragments between 104 and 600 bp (Fig 1B and Table S1) and  
140 confirmed the accumulation of virus transcripts representing the seven segments in *A. thaliana*  
141 and *N. benthamiana* leaves. Representative PCR products representing RNA1, RNA5, RNA6  
142 and RNA7 from samples of *A. thaliana*, *N. benthamiana* and rose leaves were sequenced.  
143 Multiple sequence alignment using CLUSTALW confirmed that the PCR products were RRV  
144 transcripts. Data compiled from multiple experiments (Table 1) showed that virus infection was  
145 detected in 72% (13/18) and 100% (12/12) of sap-inoculated *Arabidopsis* and *N. benthamiana*  
146 plants, respectively, by 6 days post inoculation (dpi) (SI Appendix, Methods).

147 To further demonstrate that RRV can be mechanically inoculated to plants using an artist  
148 airbrush, we used the dsRNA binding-dependent fluorescence complementation (dsRBFC)  
149 assay, consisting of FHV B2, to detect RRV dsRNAs, which accumulate as replication  
150 intermediates, in *N. benthamiana* leaves. The two FHV B2 dsRNA binding domains fused to N-  
151 and C-terminal halves of YFP were introduced into binary plasmids and delivered by  
152 *Agrobacterium* into RRV inoculated and mock-inoculated *N. benthamiana* leaves. Binding by  
153 B2 proteins to common dsRNAs brings the two halves of YFP together and produced visible  
154 yellow fluorescence (38) throughout the epidermal cells of RRV infected leaves taken from four  
155 plants but was not reconstituted in mock-inoculated leaves (Fig 1C). The combined results of  
156 RT-PCR and dsRBFC confirm that RRV can successfully infect *A. thaliana*, and *N. benthamiana*  
157 following mechanical inoculation. These data establish that RRV infection can be established in  
158 host plants without requiring a population of viruliferous mites to establish infection. These data  
159 also identified two alternative host for RRV.

## 160 **Construction of functional infectious clone of RRV and mechanical inoculation to rose** 161 **plants**

162 To prepare the RRV infectious clone, the full-length cDNAs for agRNA1 (7026 bp),  
163 agRNA2 (2245 bp), agRNA3 (1544 bp) and agRNA4 (1541 bp) were synthesized *do novo* and  
164 inserted into the small binary plasmid pCB301-HDV, which contains the double CaMV 35S  
165 promoter, HDV antigenomic ribozyme, and Nos terminator (25). Plasmids were named

166 pCB301-agRNA1, -agRNA2, -agRNA3, and -agRNA4. Then cDNAs encoding the agRNA5  
167 (1665 bp), agRNA6 (1402 bp), and agRNA7 (1649 bp) were directly amplified through RT-PCR  
168 using total RNA isolated from infected rose leaves, and then introduced into the pCB301-HDV  
169 backbone creating pCB301-agRNA5, -agRNA6, and -agRNA7 plasmids. The antigenomic cDNA  
170 positioned next to the CaMV 35S promoter and HDRz to produce viral transcripts with authentic  
171 5' and 3' ends (Fig. 2). All constructs were confirmed by sequencing before being transformed  
172 into *A. tumefaciens*.

173 Agrobacterium cultures were combined in equal ratios and we inoculated two cultivars of  
174 roses ('The Knock Out'® and 'The Double Knock Out'®) with all seven clones encoding RRV  
175 antigenomic segments (RRV1-7) using an artist airbrush. We monitored plants, especially the  
176 new emerging branches and leaves, for symptoms for 48 days. Systemic infection was  
177 detected in new emerging leaves using the diagnostic agRRV4-F1/R1 primer set (Table 1).  
178 Between 30 and 40 dpi, 88 -100% of plants became systemically infected. Pictures were taken  
179 at 48 dpi. The foliar symptoms were different between the two cultivars. The upper non-  
180 inoculated leaves of 'The Knock Out'® roses tested positive for virus infection but showed no  
181 symptoms (Fig 3A, B). At 48 dpi 'The Knock Out'® roses did not show any signs of witch's  
182 broom, which is the characteristic symptom for rose rosette disease. 'The Double Knock Out'®  
183 roses showed early signs of witch's broom (Fig. 3C-G). The internode length was smaller than  
184 the healthy plants. The leaves were rounder and misshapen and this exposed the thorniness of  
185 the plants. Apical buds and the stem showed necrotic patches. We conducted diagnostic RT-  
186 PCR (Table 1) and genome segment specific RT-PCR to confirm systemic infection (Suppl. Fig.  
187 1). Diagnostic RT-PCRs produced the expected size fragments between 104 and 600 bp (Fig  
188 3B and Table S1) and confirmed the accumulation of virus transcripts representing the seven  
189 segments. These data were surprising because it is commonly accepted that to initiate infection  
190 from cDNA clones encoding antigenomic RNAs of negative strand RNA viruses requiring adding  
191 plasmids expressing the viral replicase, viral nucleocapsid, and viral glycoprotein, as well as  
192 viral encoded RNA silencing suppressors *in trans* (7).

### 193 **Agro-delivery of infectious clones to Arabidopsis produces successful infection and** 194 **unexpected disease phenotypes**

195 The first report of RRV genome sequence identified four segments and then a  
196 subsequent report identified three additional segments (2, 3). From these reports it is not clear  
197 whether the first four segments are the essential elements for infection, or if all seven segments  
198 are essential. We analyzed the coding sequences of each RNA segment in both orientations

199 and determined each to be monocistronic. InterPro was used to search for proteins with similar  
200 sequences to the predicted translation products of each viral RNA. The results indicate that  
201 RNA1 encodes a protein that is 2276 amino acids in length and likely functions as the viral RNA  
202 dependent RNA polymerase. RNA2 encodes a protein that is 645 amino acids in length and is  
203 predicted to be the membrane glycoprotein to encapsulate the virus genome. RNA3 encodes a  
204 319 amino acid length protein that is predicted to be the nucleocapsid, and RNA4 encodes a  
205 361 amino acid protein that is predicted to be the movement protein (Table S2). Each RNA5,  
206 RNA6 and RNA7 are predicted to be monocistronic and InterPro searches carried out using the  
207 predicted translation products did not reveal any putative functions for these proteins (Table  
208 S2). These results led us to investigate whether RNAs1 through 4 were sufficient to achieve  
209 systemic infection or if all seven RNA segments are essential.

210 *Agrobacterium* cultures were combined in equal ratios and then infiltrated to twenty-  
211 three-day old *A. thaliana* (Col-0) plants that were grown in short day length (10 h light and 14 h  
212 dark, 23°C) (Fig. 3). We determined that agroinfiltration technology works well for delivery of  
213 infectious clones to these plants, although it does not seem effective for delivery to roses. Four  
214 to six plants were inoculated with the combination of RRV segments 1, 2, 3 and 4 (RRV1-4) or  
215 the combination of RRV segments 1 through 7 (RRV1-7) and experiments were repeated 3  
216 times. Control plants were agroinfiltrated to deliver an empty pCB301 plasmid (Mock). For  
217 *Arabidopsis*, RT-PCR was carried out at 25 dpi to detect RNA4 related transcripts in the upper  
218 non-inoculated leaves confirming that the plants became systemically infected (Table 1). The  
219 pooled data showed that the majority of plants inoculated with RRV1-4 or RRV1-7 became  
220 infected (Table 1). These data confirmed our expectations that RNA1-4 contain the essential  
221 features for successful infection.

222 We also noted that *Arabidopsis* plants produced a disease phenotype that is different  
223 from roses. *Arabidopsis* inflorescences emerged in mock treated plants around 59 days after  
224 germination while among plants inoculated with RRV1-4 or RRV1-7, the inflorescences  
225 emerged much earlier, at 45 days (Fig. 3). Plant height from the soil surface to the top of the  
226 inflorescences were measured for all plants at 68 days after germination (45 dpi) and the  
227 average height for mock treated *A. thaliana* plants was 22.0 cm (Table 2). Plants infected with  
228 RRV1-4 or RRV1-7 were taller than mock treated plants, ranging in height from 45-51 cm (Fig.  
229 3A, Table 2). Conventional RT-PCR verified the presence of RRV1-4 or RRV1-7 in plants that  
230 were measured (Fig. 3B). The RRV1-4 or RRV1-7 inoculated leaves primarily displayed

231 symptoms that were mild yellow mottling which was not seen on the mock treated and untreated  
232 leaves (Fig. 3C).

233 The plant structure was altered by infection. After bolting, mock inoculated plants  
234 produced three inflorescence stems with five to six cauline leaves and a solitary flower (Fig. 3A  
235 and 3D; Table 2). All plants infected with RRV1 -4 or RRV 1-7 produced the three major  
236 inflorescences with multiple leaves and higher order branches with a greater abundance of  
237 flowers (Fig. 3A and 3E, Table 2). Plants infected with RRV1-7 showed more basal leaves in the  
238 vegetative rosette than mock-inoculated plants and RRV1-4 infected plants (Fig. 3F). RRV1-4  
239 and RRV1-7 infected plants showed an abundance of aerial rosettes that form at the axils where  
240 cauline leaves normally develop, suggesting that virus infection alters the developmental  
241 patterning of axillary meristems (Fig 3G and H; Table 2). The number of siliques on mature  
242 infected plants at 45 dpi was 4- to 5-fold greater than on mock treated plants (Table 2). Virus  
243 infected plants produced more seed than mock treated plants. The 1000 seed weight for mock  
244 treated plants was 16 mg, while RRV1-4 and RRV1-7 infected were 17 mg and 18 mg  
245 respectively. Seeds were collected from plants, and 120 seeds were germinated on ½ MS  
246 media and 100 % of the seeds germinated producing plants.

#### 247 **Agro-delivery of infectious clones to *N. benthamiana* produces successful infection**

248 Among the *N. benthamiana* plants inoculated with RRV1-4 or RRV1-7, 75-85% were  
249 confirmed by RT-PCR to be systemically infected within 25 dpi (Table 1). Plants symptoms at  
250 20-25 dpi varied widely from mild to severe yellow mottling (Fig. 4A, 4B and 4C). We conducted  
251 individual RT-PCR to verify the presence of each RNA segment or, multiplex RT-PCR to  
252 simultaneously detect all seven RNA segments (Fig. 4D and 4E)(SI Appendix, Methods). To  
253 demonstrate that equal amounts of RNA were used for RT-PCR analysis, we used primers to  
254 detect EF1 in *N. benthamiana* and Actin in roses as internal controls (Table S1) and loaded  
255 equal volumes of PCR products in each lane to show similar amplicon levels among each  
256 sample (Fig. 4D). The PCR products representing RNA segments 1 through 4 varied between  
257 samples. Fig 4D shows two representative samples that demonstrate the appearance that the  
258 viral RNAs do not accumulate to equivalent levels in infected leaves within a single infected  
259 plant. We also noted the levels of virus accumulation in systemic leaves of the same age can  
260 vary significantly between plants. PCR products detecting RNA1 often produced lower product  
261 accumulation than did RNA2, RNA3 and RNA4 (Fig. 4D) using these primer sets. In another set  
262 of experiments, we employed the aatbRRV F/R primer set (Table S1) that recognizes the  
263 conserved 5' and 3' sequences of all seven RNAs that produce amplicons of all seven RNAs in



264 single multiplex reaction (Fig. 4E). Similar primer sets were reported in Babu et al (2016) to  
265 produce intermediate length and full length amplicons (3). In these experiments (Fig. 4E), all  
266 RNAs were readily detected in plants infected with RRV1-4 or RRV1-7. In this case full length  
267 amplicons corresponding to RNA2 were not always abundant between samples. There were  
268 intermediate size amplicons of 1.8 and 2.0 kb which are likely derivatives of RNA 2 as reported  
269 in Babu et al (2016). The genomic RNAs 3 and 4 are 1544bp and 1541 bp respectively, RNA6 is  
270 1402 bp, and the RNA5 and 7 are 1655bp and 1649 bp respectively. The resulting PCR  
271 products representing RNAs3-7 co-migrate on an agarose gel (Fig. 4E).

272         Among the *N. benthamiana* plants that were inoculated with RRV1-4 (Table 1), the two  
273 samples in Fig. 4D were selected to analyze for the presence of RRV dsRNAs using RNase  
274 protection assays (39). These were chosen because one sample produced low levels of PCR  
275 products and the second sample generated 5- to 10- fold more product (Fig. 4D and F).  
276 Amplicons ranging from 500 to 585 bp were generated indicating double strand RNAs 1, 2, 3  
277 and 4 are present in infected *N. benthamiana* plants but not in the mock treated plants (Fig 4F).  
278 RNA from infected rose plants from field samples produced similar RNAs 1-4 amplicons while  
279 none were detected in healthy rose samples (Fig. 4E).

280         To further verify that these *N. benthamiana* plants were infected with RRV, we prepared  
281 sap inoculum using (1:30 w/v) 0.05 M phosphate buffer (pH 7.0) and leaves from a *N.*  
282 *benthamiana* plant infected with RRV1-7 at 25 dpi. This sap was used to inoculate six  
283 Arabidopsis plants (6-leaf stage) using an artist airbrush (SI Appendix, Methods). RT-PCR was  
284 done at 25 dpi using RNA extracted from upper non-inoculated leaves of the Arabidopsis plants  
285 and two of the six inoculated plants tested positive for RRV infection (Table 1).

## 286 **Stable expression of GFP-P4 fusion protein during RRV infection**

287         The ability to engineer GFP into the recombinant cDNAs encoding viruses has been  
288 powerful for studying virus cell-to-cell and systemic movement in plants. The GFP gene was  
289 introduced into RNA4 as a fusion to the P4 open reading frame (Fig. 5A) to determine if this  
290 infectious clone could be tagged with a visual marker to track virus movement. Plants were  
291 infiltrated with RRV1-4 or RRV1-7 using the GFP containing construct (named 4R4-GFP or  
292 7R4-GFP). Experiments were repeated 3-5 times using *Arabidopsis* and *N. benthamiana*  
293 plants. While 50% of Arabidopsis plants became infected with 4R4-GFP or 7R4-GFP, all *N.*  
294 *benthamiana* plants became systemically infected (Table 1). The infected *N. benthamiana*  
295 plants showed necrotic regions on the inoculated leaves at 12 dpi, and throughout the upper

296 leaves as the virus continued to spread systemically (Fig. 5A). By 35 dpi, virus- infected plants  
297 showed significant systemic yellowing and necrosis, while mock treated plants remained green  
298 (Fig. 5A). GFP was not obvious when observing under a hand-held UV lamp, however, we  
299 could easily detect GFP using an epifluorescence microscope (Fig. 5B). GFP-P4 fusions may  
300 not be a useful visual reporter for whole plant studies, especially if the fusion is the cause of  
301 necrosis, but may be suitable for microscopic imaging to track P4 proteins in infected cells.  
302 Immunoblot analysis was used to confirm the GFP fusions in 4R4-GFP and 7R4-GFP  
303 inoculated plants. We detected the abundant ~70 kDa fusion protein in upper non-inoculated  
304 leaves at 19 dpi (Fig 5C). Diagnostic RT-PCR using agRRV4-F1/R1 primer set that detects a  
305 500 bp fragment of RNA4 was done to verify that the plants were infected (Fig. 5D; Table 1). To  
306 further confirm that all RNA segments spread systemically, we conducted RT-PCR, to detect  
307 each genome segment as in Fig. 5. Representative gels in Fig. 5E demonstrate that in each  
308 experiment where plants were inoculated with the infectious clone combining four or seven  
309 segments, they became systemically infected with all segments. We used the agRRV4-F1 and  
310 smeGFP-R primers to detect a 1266 bp band for RNA4. Notably we sometimes observed 2  
311 bands overlapping the GFP sequence in RRV-4 which raises the possibility that GFP may not  
312 be stable and there may be some recombination within this segment (Fig. 5E).

### 313 **iLOV-based fluorescent reporter introduced into RRV genome**

314 The iLOV protein is a fluorescent flavin based domain of the plant blue light receptor,  
315 phototropin (24). The iLOV is a photoreversible fluorescent protein that is an excellent  
316 alternative to GFP for tracking virus infection (24). We introduced iLOV into the RRV genome  
317 fused to the ORF2 (Fig 6A). *N. benthamiana* plants were inoculated with RRV-4R2-iLOV and  
318 RRV-7R2-iLOV (Fig. 6B). All plants were systemically infected by 25 dpi and produced yellow  
319 mottling symptoms on infected leaves. The P2-iLOV fusion seemed less necrotic to the plant  
320 than P4-GFP fusion during RRV infection. Epifluorescence microscopy detected the iLOV  
321 fusion proteins in epidermal cells at 13 dpi (Fig. 6B). The iLOV coding sequence was also  
322 introduced into RNA5, replacing the ORF5 sequence (Fig. 6A, C). Plants were infiltrated with  
323 RRV-7R5-iLOV and systemic mottling and necrosis symptoms were evident at 25 dpi (Fig. 6C).  
324 Epifluorescence microscopy also detected the iLOV fusion proteins at 13 dpi in the upper non -  
325 inoculated leaves (Fig. 6D). Diagnostic RT-PCR using the agRRV4-F1/R1 primer set was  
326 performed to verify that the plants were infected (Fig. 6D). As with the prior experiments, we  
327 conducted additional RT-PCR to detect each genome segment confirming systemic infection  
328 (Fig. 6E). We used the agRRV2-F1 and R2\_iLOV-R primers to detect a 1080 bp band for RNA2

329 that overlaps the fused viral and iLOV sequences. We used IF-agR5\_F and iLOV-R primer pair  
330 to detect the iLOV sequences in RNA5 and this produced a 433 bp band (Fig. 6E). Both RNA2  
331 and RNA5 can support infection with the iLOV insertion. The amplicon RNA5-iLOV is more  
332 abundant than the RNA2-iLOV (Fig. 6E).

333

## 334 **DISCUSSION**

335 An infectious virus clone from a cDNA copy of the viral genome is a powerful tool for  
336 reverse genetic studies of any virus. For viruses with negative strand RNA genomes, infectious  
337 clones of several bunyaviruses infecting mammals (27, 40) have been reported but there has  
338 been limited progress in developing such technology for plant infecting viruses (7). The main  
339 limitation is that the naked RNA is not itself transmissible and infectious without the inclusion of  
340 the viral nucleocapsid protein (34). In 2015, there was a breakthrough in the production of an  
341 infectious virus from cloned *Sonchus yellow net virus* (SYNV) cDNAs. The strategy was to  
342 clone the full-length viral genome encoding cDNA into binary vectors next to the 35S promoter  
343 and provide the nucleocapsid (NC) and replication factors on separate plasmids (7, 25, 26).  
344 Success in this system required the co-delivery of the viral replicase as well as several viral  
345 silencing suppressor proteins to reduce the effects of the cellular silencing machinery while  
346 galvanizing the initial replication steps (6, 7, 26). There is also a breakthrough in developing a  
347 reverse genetic system for tospoviruses by the Tao Xiaorong lab (personal communication).  
348 Here we report the first infectious clone of a member of the *Emaravirus* genus of multipartite  
349 negative strand RNA virus, a breakthrough technology establishing a reverse genetic system for  
350 RRV. This technological advance is remarkable because the plasmids containing viral  
351 antigenomic cDNAs that produce infection without providing the viral replicase, NC proteins or  
352 silencing suppressor proteins on separate plasmids. The ability to deliver these plasmids to  
353 roses using the airbrush or to *Arabidopsis* and *N. benthamiana* by agro-infiltration was not  
354 expected since RRV is reported to be only transmissible by a mite vector (37, 41). This opens  
355 new possibilities for molecular characterization of plant emaraviruses and adds to the  
356 established tools needed by virologists and rose breeders to combat infection. This new  
357 technology is important to accelerate up the process of identifying genes conditioning resistance  
358 to the virus that can be introgressed into new rose cultivars.

359

360 RRV is the most devastating viruses of roses in North America. The disease and its  
361 symptoms were described in the 1940s and it was first described as a virus with a negative-

362 sense RNA genome in 2011 (2). Initially, RRV was reported to have 4 genomes segments.  
363 RNAs 5, 6 and 7 were identified and sequences were reported in NCBI between 2014 and 2016  
364 (3). Here we report the first-generation binary RRV infectious clones that produce all seven RNA  
365 segments. RNA segments 1-4 were derived from sequences provided in NCBI. The segments  
366 of RNAs 5-7 were PCR amplified from infected roses. We demonstrate that the infectious  
367 clone produces significant changes to the structure of Arabidopsis plants, while producing  
368 chlorotic and mild symptoms in *N. benthamiana* during the 60 days that we monitored infection.  
369 The two rose cultivars showed different symptoms, with the Double Knockout presenting early  
370 evidence of witch's broom disease. The effects of RRV on Arabidopsis plant growth, branching,  
371 and silique development makes this reverse genetic system a powerful tool for studying how  
372 viruses can alter the plant development programming. This is valuable because reports by rose  
373 breeders and gardeners identify rose plants that are infected with RRV to have excessive thorns  
374 and witches' broom. The onset of these disease symptoms from the time of inoculation is not  
375 known and it is possible that it may take more than one season to see these changes in an  
376 outdoor garden (36, 41). This new infectious clone technology will also enable investigators to  
377 monitor the progression of disease in susceptible host plants and learn more about how RRV  
378 changes rose plant development over multiple seasons. Because we can see rapid changes in  
379 the plant architecture of Arabidopsis, we can begin to study the changes in plant developmental  
380 programming using the RRV infectious clone as a virus-host model system to inform genetic  
381 studies in roses. This new powerful technology will accelerate the development of roses  
382 resistant to RRV.

383 This study used two technologies to detect viral dsRNA and confirm successful infection  
384 of plants by mechanical inoculation with sap or infectious clones. The first assay using dsRNA  
385 binding-dependent fluorescence complementation technology in live plant tissue. Yellow  
386 fluorescence was seen in virus infected but not mock inoculated leaves. RNase protection  
387 assay was also used to verify the accumulation of RRV1-4 in systemically infected leaves (38,  
388 39). Early studies of negative-strand RNA viruses reported that the viral RNA-dependent RNA  
389 polymerase produces little or no dsRNAs as replicative intermediates in most of these viruses  
390 (42). However more recently, dsRNA production was detected using immunofluorescence  
391 antibody staining in *Vesicular stomatitis virus* (VSV), *Measles virus* (MeV), *Influenza A virus*  
392 (IAV) and *Nyamanini virus* (NyaV) which all belong to different families with negative strand  
393 RNA genomes (43). With RRV, dsRNA accumulation is mainly in the cytoplasm although higher  
394 resolution microscopic studies are needed to determine if there is any pattern of nuclear

395 accumulation. While the dsRNA detection technology used in this study is not specific for RRV,  
396 excluding other possible sources of infection or cellular dsRNAs, the results obtained here  
397 including the mock treated plants, show a correlation between RRV infection and dsRNA  
398 detection *in vivo*. The RNase protection assays detected RRV dsRNAs that were recovered  
399 from infected plants using PCR primers to amplify only RRV templated molecules, and this  
400 provides more specific verification that infection produced systemic dsRNA as a cellular product  
401 of the viral RNA-dependent RNA polymerase.

402 We introduced GFP and iLOV proteins into three locations of the RRV genome to  
403 contrast the effects of inserting heterologous genes on virus infection and host symptoms.  
404 There appears to be no change in virus accumulation or delay in systemic spread when the  
405 infectious clones harbored either the GFP or iLOV genes. However, the pattern of symptoms  
406 was altered by each insertion, although the infectious clones with the iLOV insertion caused  
407 milder symptoms than did the infectious clone with the GFP insertion, suggesting that the nature  
408 and position of the fluorogenic reporter could influence virus protein activities. It was interesting  
409 to see that the infectious clone with the P2-iLOV fusion or the insertion replacing the P5 gene  
410 produced mild yellowing and occasional minor necrosis in *N. benthamiana* plants, while the P4-  
411 GFP fusion changed the disease pattern, turning leaves necrotic. This result suggests that P4,  
412 which is already identify as a putative movement protein in the *Emaravirus* family (Table S2),  
413 could also have an anti-necrotic function. We noted that a reduced number of Arabidopsis  
414 plants became infected with the 4R4-GFP or 4R7-GFP compared to infectious clones containing  
415 the iLOV gene, suggesting that the P4-GFP fusion could also reduce virus movement ability.  
416 The P2 of *Emaravirus* is a glycoprotein with unknow function as P5 (Table S2). The P2-iLOV  
417 fusion and P5 replacement seems to be less disturbing for the virus cycle since RRV-RNA2-  
418 iLOV and RRV-RNA5-iLOV infectious clone induce less necrose than the RRV-RNA4-GFP  
419 infection. We also noticed that on occasion, PCR amplification of GFP produced two bands  
420 while the iLOV always produced a single band. It is worth speculating that GFP may be a less  
421 stable insert and that the smaller bands were the result of recombination within the viral RNA.  
422 The iLOV protein is smaller than GFP and for that reason maybe more easily incorporated into  
423 the genome. However, although both were visible using a microscope, neither of these  
424 fluorescent proteins could be seen using a hand-held UV lamp. Thus, more investigations are  
425 needed to develop a second-generation infectious clone that contains a visible reporter of  
426 infection that is less necrotic and easily visible using a hand-held lamp.

427 Finally, our research found that rose plants are difficult to agro-infiltrate. We were able  
428 to overcome this obstacle to virus delivery by using an artist airbrush. Using this delivery  
429 system, we were able to introduce the RRV1-7 infectious clone to rose plants. Plants were  
430 observed for more than 45 days to confirm infection and we noted that different rose cultivars  
431 show different diseases patterns and susceptibility.

432 In summary, we established a new infectious clone technology for plant infecting  
433 negative strand RNA viruses that can be broadly used for reverse genetic studies and for  
434 breeding programs to characterize rose germplasm for virus resistance. The most significant  
435 and surprising outcomes was that this infectious clone system does not require additional  
436 plasmids containing replication factors to galvanize the replication cycle. We cannot answer  
437 why this the case for this virus, but we are initiating new investigations of virus replication in  
438 isolated plant protoplasts to gain new information about emaravirus replication . We established  
439 dsRNA detection technology for detecting RRV infection in cells that are enriched for viral  
440 sequences. We demonstrated that iLOV may be a better reporter of infection than GFP. Future  
441 efforts will be made to improve the infectious clone technology for expression of heterologous  
442 protein expression and further establish this new robust reverse-genetic system. This  
443 technology opens the possibility to begin to screen rose plants for new sources of resistance  
444 that can be used in future breeding programs.

445

## 446 **Materials and Methods**

### 447 **Construction of RRV infectious clones**

448 All plasmids were maintained in *Escherichia coli* DH5 $\alpha$  cells and in *Agrobacterium tumefaciens*  
449 strain GV3101. Synthesized full-length cDNAs of the antigenomic (ag)RNA sequences for RRV  
450 segments 1 through 4 (NCBI reference sequences NC\_015298.1, NC\_015299.1, NC\_015300.1,  
451 and NC\_015301.1) were prepared and inserted into pUC57 and pCB30-HDV plasmids by  
452 GenScript (Piscataway, NJ). The pCB301-HDV plasmid is a binary plasmid with a duplicated  
453 cauliflower mosaic virus (CaMV) 35S promoter and 3' hepatitis delta virus ribozyme (HDRz)  
454 sequence which was provided by Dr Zhenghe Li (Zhejiang University, Hangzhou China). The  
455 full length agRNA segments 5, 6 and 7 (MN095111, MN095112, MN095113) were amplified by  
456 RT-PCR prepared from infected rose leaves (var 'Julia Child') using the following primer pairs:  
457 IF\_agR5F/R, IF\_agR6F/R, and IF\_agR7F/R (Table 1) with 15 nt that overlap vector sequences  
458 (Table 2).

459 To introduce smeGFP (MN095110) into the RRV genome, unique *Stul* and *SmaI* restriction  
460 sites (aggcctcccggg) were engineered into the 3' end of RRV\_R4 ORF at 1167-1669 in  
461 pCB301-RNA4. Single molecule GFP (smeGFP) was PCR amplified from a TRV-smeGFP  
462 plasmid using the smeGFP\_F/R primer pair containing *Stul* and *SmaI* restriction sites (Table 1).  
463 Linearized vectors and PCR products were ligated to generate pCB301-R4-smeGFP. To  
464 prepare pCB301\_R2 iLOV and pCB301\_R5 iLOV constructs, the primers of R2\_iLOV.F/R with  
465 pCB301\_R2.F/R and R5\_iLOV.F/R with pCB301\_R5.F/R (Table 1) were used to amplify iLOV  
466 fragments from TMV\_iLOV (24) and fragments of pCB301\_R2 and pCB301\_R5. All PCRs were  
467 carried out using high-fidelity 2X Platinum SuperFi® Green PCR Master Mix (Invitrogen). The  
468 high fidelity directional In-Fusion® HD Cloning Kit (Takara Bio USA, Inc.) was used to introduce  
469 each amplified full-length cDNA into the pCB301-HDV.

#### 470 **Plant materials and virus inoculation**

471 *Arabidopsis thaliana* plants were grown in at 23°C with a 10 h/14 h (day/night)  
472 photoperiod in a growth chamber. *Nicotiana benthamiana* were grown at 23°C with 16 h/ 8 h  
473 (day/night) photoperiod in a growth chamber. Rose plants were grown in a greenhouse with  
474 temperature settings to at 23°C. Three-weeks-old plants were inoculated with extracts taken  
475 from rose rosette virus infected rose plants (var. Julie Child). Plant extracts were prepared by  
476 grinding 0.5 g infected leaves in 15 mL (1:30 w/v) 0.05 M phosphate buffer (pH 7.0) and filtered  
477 through cheesecloth. Then SUPERaseIn™ RNase inhibitor (Invitrogen) (1 U/ml) and 0.1%  
478 volume of Silwet-77 were added to the extract and loaded to the reservoir of an artist airbrush.  
479 Plants were lightly dusted with carborundum and extracted leaf homogenate was applied using  
480 the Central Pneumatic® ¾ an 3 oz airbrush kit (Harbor Freight, Plano TX) (Fig. 1A).

481 Three-weeks-old plants were also infiltrated with *A. tumefaciens* cultures harboring  
482 constructs for each RRV agRNA segment. Cultures were grown overnight in YEP media,  
483 resuspended in MES buffer (10 mM MgCl<sub>2</sub>, 10 mM MES, pH 5.6, and 150 μM acetosyringone),  
484 and adjusted to an optical density A<sub>600</sub> of 1.0. After a 2-4 hours of incubation in the dark, equal  
485 volumes of each *Agrobacterium* culture were mixed at 1.0 OD and loaded to a 1 ml syringe for  
486 infiltration to *N. benthamiana* and *Arabidopsis*. Mixed *Agrobacterium* cultures were delivered to  
487 rose plants using the Central Pneumatic® air brush.

488

#### 489 **dsRNA binding-dependent fluorescence complementation (dRBFC), RT-PCR and, RNaseI** 490 **protection assays**

491 The dsRNA binding-dependent fluorescence complementation assay was performed  
492 according to Cheng et al (2015) (38). *Agrobacteria* expressing B2-YN and B2-YC (Addgene)  
493 were mixed in equal amounts and directly infiltrated into *N. benthamiana* leaves that were  
494 inoculated with RRV containing sap and control leaves that were treated with buffer only. The  
495 YFP fluorescence was visualized using a Nikon Eclipse 90i epifluorescence microscope.

496 Total RNA was extracted from the upper leaves of plants infiltrated with the infectious  
497 clone using the Maxwell® 16 Instrument LEV simplyRNA Purification Kits (Promega). All  
498 reverse transcription reactions were carried out using random primers and the High-capacity  
499 cDNA reverse transcription kit (Applied Biosystems®). PCR amplification was performed using  
500 GoTaq® G2 master mixes DNA polymerase (Promega) with the following primer pairs:  
501 agRRV1-F1/R1, agRRV2-F1/R1, agRRV3-F1/R1, agRRV3-F2/R2, agRRV4-F1/R1, agRRV5-  
502 F1/R1, agRRV5-F1/R1, agRRV6-F1/R1 and agRRV7-F1/R1 (Table 1). We used primer pairs  
503 to detect Actin and EF1 transcripts (44) in *Arabidopsis* and *N. benthamiana* and roses as  
504 internal controls for RT-PCR verification of virus infected plants (Table 1)

505 RNaseI protection assays were performed using total RNA (5 ug) from *N. benthamiana*  
506 leaves, as well as infected or healthy rose leaves from field samples according to (39).  
507 Samples were treated with DNase I for 1 h at 37°C. RNase I-treated RNA was reverse  
508 transcribed using random primers and then amplified using the following primer pairs: agRRV1-  
509 F1/R1, agRRV2-F1/R1, agRRV3-F2/R2 and agRRV4-F1/R1 (Table 1). All PCR amplified  
510 products were subjected to 1.2% agarose gel electrophoresis stained with ethidium bromide  
511 (39).

## 512 **Immunoblot detection of plant viruses**

513 Total proteins were extracted from healthy and systemically infected *N. benthamiana*  
514 leaves using extraction buffer (100mM Tris-HCl, pH6.8, 2.5%SDS, 100mMDTT, 100 mMNaCl  
515 and 10% glycerol). Proteins were separated on 4–20% Mini-PROTEAN® TGX™ Precast  
516 Protein Gels (Bio-Rad) and then transferred to PVDF membranes using the Trans-Blot Turbo  
517 System (Bio-Rad). Blots were probed with HRP-conjugated GFP-tag mouse monoclonal  
518 antibody (Proteintech, Rosemont IL). Membranes were also monitored for equal loading by  
519 staining with Ponceau S or Coomassie blue.

## 520 **Epifluorescence microscopy**



521 Leaves were examined with a Nikon Eclipse 90i epifluorescence microscope using the  
522 FITC (Fluorescein Isothiocyanate) filter (excitation 465nm/495nm; emission 515nm/555nm) to  
523 detect YFP, GFP and iLOV. Images were captured using a DS-Ri1 camera and NIS-Elements  
524 AR-3.2 software (Nikon).

525

526

## 527 **Acknowledgements**

528 Dr. Li Zhenghe from Zhejiang University for providing the pCB301-HDV plasmid for our  
529 constructions. Michele Scheiber at Star Roses and Plants for providing rose liners for  
530 experiments. The American Rose Society for providing financial gift that enabled this research.  
531 USDA's National Institute of Food and Agriculture (NIFA) Specialty Crop Research Initiative  
532 project "Combating Rose Rosette Disease: Short Term and Long-Term Approaches" (2014-  
533 51181-22644/ SCRI).

## 534 **References**

- 535 1. Mielke-Ehret N, Mühlbach HP. 2012. Emaravirus: a novel genus of multipartite, negative  
536 strand RNA plant viruses. *Viruses* 4:1515-36.
- 537 2. Laney AG, Keller KE, Martin RR, Tzanetakis IE. 2011. A discovery 70 years in the  
538 making: characterization of the Rose rosette virus. *J Gen Virol* 92:1727-32.
- 539 3. Babu B, Washburn BK, Poduch K, Knox GW, Paret ML. 2016. Identification and  
540 characterization of two novel genomic RNA segments RNA5 and RNA6 in rose rosette  
541 virus infecting roses. *Acta Virol* 60:156-65.
- 542 4. Di Bello PL, Ho T, Tzanetakis IE. 2015. The evolution of emaraviruses is becoming more  
543 complex: seven segments identified in the causal agent of Rose rosette disease. *Virus*  
544 *Res* 210:241-4.
- 545 5. Ahlquist P, French R, Janda M, Loesch-Fries LS. 1984. Multicomponent RNA plant virus  
546 infection derived from cloned viral cDNA. *Proc Natl Acad Sci U S A* 81:7066-70.
- 547 6. Qian S, Chen X, Sun K, Zhang Y, Li Z. 2017. Capped antigenomic RNA transcript  
548 facilitates rescue of a plant rhabdovirus. *Virol J* 14:113.
- 549 7. Jackson AO, Li Z. 2016. Developments in plant negative-strand RNA virus reverse  
550 genetics. *Annu Rev Phytopathol* 54:469-98.
- 551 8. Desbiez C, Chandeysson C, Lecoq H, Moury B. 2012. A simple, rapid and efficient way  
552 to obtain infectious clones of potyviruses. *J Virol Methods* 183:94-7.
- 553 9. Chikh Ali M, Said Omar A, Natsuaki T. 2011. An infectious full-length cDNA clone of  
554 potato virus Y (NTN-NW), a recently reported strain of PVY that causes potato tuber  
555 necrotic ringspot disease. *Arch Virol* 156:2039-43.
- 556 10. Bedoya LC, Daros JA. 2010. Stability of Tobacco etch virus infectious clones in plasmid  
557 vectors. *Virus Res* 149:234-40.

- 558 11. Flatken S, Ungewickell V, Menzel W, Maiss E. 2008. Construction of an infectious full-  
559 length cDNA clone of potato virus M. *Arch Virol* 153:1385-9.
- 560 12. Bordat A, Houvenaghel MC, German-Retana S. 2015. Gibson assembly: an easy way to  
561 clone potyviral full-length infectious cDNA clones expressing an ectopic VPg. *Virol J*  
562 12:89.
- 563 13. Lindbo JA. 2007. TRBO: a high-efficiency tobacco mosaic virus RNA-based  
564 overexpression vector. *Plant Physiol* 145:1232-40.
- 565 14. Boyer JC, Haenni AL. 1994. Infectious transcripts and cDNA clones of RNA viruses.  
566 *Virology* 198:415-26.
- 567 15. Dolja VV, McBride HJ, Carrington JC. 1992. Tagging of plant potyvirus replication and  
568 movement by insertion of beta-glucuronidase into the viral polyprotein. *Proc Natl Acad*  
569 *Sci U S A* 89:10208-12.
- 570 16. Mardanova ES, Kotlyarov RY, Kuprianov VV, Stepanova LA, Tsybalova LM, Lomonosoff  
571 GP, Ravin NV. 2015. Rapid high-yield expression of a candidate influenza vaccine  
572 based on the ectodomain of M2 protein linked to flagellin in plants using viral vectors.  
573 *BMC Biotechnol* 15:42.
- 574 17. Dickmeis C, Fischer R, Commandeur U. 2014. Potato virus X-based expression vectors  
575 are stabilized for long-term production of proteins and larger inserts. *Biotechnol J*  
576 9:1369-79.
- 577 18. Tian J, Pei H, Zhang S, Chen J, Chen W, Yang R, Meng Y, You J, Gao J, Ma N. 2014.  
578 TRV-GFP: a modified Tobacco rattle virus vector for efficient and visualizable analysis of  
579 gene function. *J Exp Bot* 65:311-22.
- 580 19. Sempere RN, Gomez P, Truniger V, Aranda MA. 2011. Development of expression  
581 vectors based on pepino mosaic virus. *Plant Methods* 7:6.
- 582 20. Stevens M, Viganó F. 2007. Production of a full-length infectious GFP-tagged cDNA  
583 clone of Beet mild yellowing virus for the study of plant-polerovirus interactions. *Virus*  
584 *Genes* 34:215-21.
- 585 21. Rabindran S, Dawson WO. 2001. Assessment of recombinants that arise from the use of  
586 a TMV-based transient expression vector. *Virology* 284:182-9.
- 587 22. Zhao Y, Hammond J, Tousignant ME, Hammond RW. 2000. Development and  
588 evaluation of a complementation-dependent gene delivery system based on cucumber  
589 mosaic virus. *Arch Virol* 145:2285-95.
- 590 23. Shivprasad S, Pogue GP, Lewandowski DJ, Hidalgo J, Donson J, Grill LK, Dawson WO.  
591 1999. Heterologous sequences greatly affect foreign gene expression in tobacco mosaic  
592 virus-based vectors. *Virology* 255:312-23.
- 593 24. Chapman S, Faulkner C, Kaiserli E, Garcia-Mata C, Savenkov EI, Roberts AG, Oparka  
594 KJ, Christie JM. 2008. The photoreversible fluorescent protein iLOV outperforms GFP as  
595 a reporter of plant virus infection. *Proc Natl Acad Sci U S A* 105:20038-43.
- 596 25. Wang Q, Ma X, Qian S, Zhou X, Sun K, Chen X, Jackson AO, Li Z. 2015. Rescue of a  
597 Plant Negative-Strand RNA Virus from Cloned cDNA: Insights into Enveloped Plant  
598 Virus Movement and Morphogenesis. *PLoS Pathog* 11:e1005223.
- 599 26. Ganesan U, Bragg JN, Deng M, Marr S, Lee MY, Qian S, Shi M, Kappel J, Peters C, Lee  
600 Y, Goodin MM, Dietzgen RG, Li Z, Jackson AO. 2013. Construction of a *Sonchus* yellow  
601 net virus minireplicon: a step toward reverse genetic analysis of plant negative-strand  
602 RNA viruses. *J Virol* 87:10598-611.
- 603 27. Hoenen T, Feldmann H. 2017. Reverse Genetics Systems for Filoviruses. *Methods Mol*  
604 *Biol* 1602:159-170.
- 605 28. Yoneda M, Guillaume V, Ikeda F, Sakuma Y, Sato H, Wild TF, Kai C. 2006.  
606 Establishment of a Nipah virus rescue system. *Proc Natl Acad Sci U S A* 103:16508-13.
- 607 29. He B, Paterson RG, Ward CD, Lamb RA. 1997. Recovery of infectious SV5 from cloned  
608 DNA and expression of a foreign gene. *Virology* 237:249-60.

- 609 30. Jackson AO, Dietzgen RG, Goodin MM, Li Z. 2018. Development of Model Systems for  
610 Plant Rhabdovirus Research. *Adv Virus Res* 102:23-57.
- 611 31. Neumann G, Watanabe T, Ito H, Watanabe S, Goto H, Gao P, Hughes M, Perez DR,  
612 Donis R, Hoffmann E, Hobom G, Kawaoka Y. 1999. Generation of influenza A viruses  
613 entirely from cloned cDNAs. *Proc Natl Acad Sci U S A* 96:9345-50.
- 614 32. Neumann G, Kawaoka Y. 1999. Genetic engineering of influenza and other negative-  
615 strand RNA viruses containing segmented genomes. *Adv Virus Res* 53:265-300.
- 616 33. Yamauchi Y (ed). 2018. *Influenza Virus Methods and Protocols*. Springer Science, New  
617 York, NY.
- 618 34. Mielke-Ehret N, Muhlbach HP. 2012. Emaravirus: a novel genus of multipartite, negative  
619 strand RNA plant viruses. *Viruses* 4:1515-36.
- 620 35. Waliczek T, Byrne D, Holeman D. 2018. Opinions of Landscape Roses Available  
621 for Purchase and Preferences for the  
622 Future Market. *Hort Technology* 28:807-14.
- 623 36. Pemberton H, Ong K, Windham M, Olson J, Byrne D. 2018. What is Rose Disease?  
624 *HortScience* 53:592-595.
- 625 37. McClellan M. 2017. Resisting Rose Rosette, vol May 2017, p 8-10. GIE Media,  
626 <http://magazine.nurserymag.com/>.
- 627 38. Cheng X, Deng P, Cui H, Wang A. 2015. Visualizing double-stranded RNA distribution  
628 and dynamics in living cells by dsRNA binding-dependent fluorescence  
629 complementation. *Virology* 485:439-51.
- 630 39. Okano Y, Senshu H, Hashimoto M, Neriya Y, Netsu O, Minato N, Yoshida T, Maejima K,  
631 Oshima K, Komatsu K, Yamaji Y, Namba S. 2014. In Planta Recognition of a Double-  
632 Stranded RNA Synthesis Protein Complex by a Potexviral RNA Silencing Suppressor.  
633 *Plant Cell* 26:2168-2183.
- 634 40. Bridgen A, Elliott RM. 1996. Rescue of a segmented negative-strand RNA virus entirely  
635 from cloned complementary DNAs. *Proc Natl Acad Sci U S A* 93:15400-4.
- 636 41. Debener T, Byrne DH. 2014. Disease resistance breeding in rose: current status and  
637 potential of biotechnological tools. *Plant Sci* 228:107-17.
- 638 42. Weber F, Wagner V, Rasmussen SB, Hartmann R, Paludan SR. 2006. Double-stranded  
639 RNA is produced by positive-strand RNA viruses and DNA viruses but not in detectable  
640 amounts by negative-strand RNA viruses. *J Virol* 80:5059-64.
- 641 43. Son KN, Liang Z, Lipton HL. 2015. Double-Stranded RNA Is Detected by  
642 Immunofluorescence Analysis in RNA and DNA Virus Infections, Including Those by  
643 Negative-Stranded RNA Viruses. *J Virol* 89:9383-92.
- 644 44. Rotenberg D, Thompson TS, German TL, Willis DK. 2006. Methods for effective real-  
645 time RT-PCR analysis of virus-induced gene silencing. *J Virol Methods* 138:49-59.

## 646 **Figure Legends**

647

648 FIG. 1. Successful mechanical inoculation of RRV.

649 (A) Image depicting the use of a hand-held artist airbrush to deliver sap inoculum to rose  
650 plants.

651 (B) RT-PCR verifies the presence of antigenomic RNA1, RNA3, RNA4, RNA5, RNA6, and  
652 RNA7 in inoculated *Arabidopsis* and *N. benthamiana*. Virus infected rose plants taken from field  
653 samples were used as a positive control in these experiments.

654 (C) Microscopic image showing the results of dsRBFC assay in mock treated and RRV infected  
655 *N. benthamiana* leaves. dsRBFC was carried out for fluorescence labelling RRV dsRNA  
656 replication intermediates. Scale bar is 50  $\mu\text{m}$ .

657

658 FIG. 2. Diagrammatic representation of constructs.

659 Open boxes depict the coding region for each segment of the RRV genome. RNA segments 1  
660 through 7 are identified on the left and the size of each segment is identified either inside the  
661 open box or on the right. GFP was introduced into RNA 4 as a direct fusion to the open reading  
662 frame creating RNA4-GFP. GFP was also fused to the foot and mouth disease virus 2a  
663 peptidase and fused to the RNA4 open reading frame to produce a self-cleaving polyprotein. All  
664 cDNAs of antigenomic viral RNAs were introduced into the binary plasmid pCB301 between the  
665 35S promoter and hepatitis delta virus ribozyme.

666 FIG. 3. Two rose varieties infected with RRV1-7 infectious clone at 55 dpi.

667 (A and B) Mock inoculated and virus infected plants that produce deep pink flowers, of 'The  
668 Knock Out'® rose variety. Infected plants do not show symptoms and resemble the mock  
669 plants although they test positive for virus.

670 (C) Image of plants in the greenhouse showing healthy roses next to infected roses of 'The  
671 Double Knock Out'® variety. These infected plants show early signs of witch's broom.

672 (D-G) Images of infected 'The Double Knock Out'® plants with witch's broom. Necrosis on  
673 leaves and early buds. Leaves are small and round.

674 FIG. 4. *Arabidopsis* infected with RRV1-4 and RRV1-7.

675 (A) Images of mock treated, RRV1-4, and RRV1-7 infected plants taken at 45 dpi (68 days  
676 after germination). (B) RT-PCR produced 500 bp product, verifying accumulation of RNA4  
677 transcripts in systemic leaves of *Arabidopsis* plants at 25 dpi. Actin primers were used for  
678 internal control amplification of 292 bp product, showing equal quantities of RNA in each lane.  
679 Final lane on the left is positive control sample from infected roses. (C) Images of inoculated  
680 leaves taken at 24 dpi (D, E) Inflorescences of mock treated and RRV1-4 infected plants at 45

681 dpi. Infected plants show larger cauline leaves and more branches. (F-H) Images of basal and  
682 aerial rosettes on plants infected with RRV1-7 at 45 dpi.

683 FIG. 5. *N. benthamiana* infected with RRV1-4 and RRV1-7.

684 (A, B) Images of mock treated and RRV1-4 infected plants at 25 dpi.

685 (C) Image of mock, RRV1-4 and RRV1-7 infected plants taken at 20 dpi shows mild symptoms  
686 compared to previous experiment in panels A and B.

687 (D) RT-PCR verified accumulation of RNA1 through RNA4 in two samples of *N. benthamiana*  
688 (lanes 1, 2) and control rose samples (lanes 5, 6). Two mock control samples were included  
689 (lanes 3, 4). RNA segments are identified on the left. The amplicon sizes are identified on the  
690 right of each ethidium bromide stained 1.2% agarose gel.

691 (E) Multiple RT-PCR using three RNA samples from plants infected with RRV1-4 (lanes 2-4)  
692 and three samples from RRV1-7 (lanes 5-7). One RNA sample from mock treated plants (M,  
693 lane 1) was included. Amplicons representing each RNA1 through 7 are identified on the right.  
694 Narrow arrows point to individual products while the block arrow identifies the aggregate of  
695 bands representing RNAs3-7 which co-migrate on a gel. The “\*” identifies intermediate size  
696 amplicons as reported in Babu et al (2016).

697 (F) RNase protection assay detecting double-stranded RNAs. Total RNAs were treated with  
698 DNase I and then treated with 0, 1, and 5 units (U) of RNase I to digest single-strand RNA,  
699 leaving dsRNA intact. RT-PCR amplification is carried out using same primers as in panel D  
700 and listed in Table 1. Products were analyzed by 1.2% agarose gel electrophoresis. The RNAs  
701 1 through 4 are identified on the left and size of each amplicon is indicated on the right. L= 1kb  
702 ladder.

703

704 FIG. 6. *N. benthamiana* infected with 4R4-GFP and 7R4-GFP.

705 (A) Introduced GFP into RNA4 fusing the coding region with the RRV RNA4 open reading  
706 frame (P4) creating the R4-GFP construct. Plants were inoculated with RRV RNAs1-4 with R4-  
707 GFP (named 4R4-GFP) or with RRV RNAs1-7 with R4-GFP (7R4-GFP). Plants showed  
708 necrosis on systemic leaves in young and mature plants.

709 (B) Microscopic imaging shows GFP expression in 4R4-GFP and 7R4-GFP leaves. Scale  
710 bars = 100  $\mu$ m.

711 (C) Immunoblot detects ~70 kDA GFP-P4 fusion protein in plants inoculated with 4R4-GFP  
712 or 7R4-GFP. The mock sample is identified in lane 0. Membranes were stained with Ponceau S  
713 or Coomassie blue to verify equal loading of samples.

714 (D) RT-PCR diagnostic using agRRV4-F1/R1 primer set to identify infected samples. Lane  
715 1 in each gel is no reverse transcript control added to PCR reaction, and lane 2 is RNA from  
716 mock treated sample. Lanes 3-6 are virus infected samples. PCR primers detecting EF1 as  
717 internal control.

718 (E) RT-PCR was carried out using 5 µg of total RNA for each sample to verify the presence  
719 of genomic and antigenomic RNA1, RNA3, RNA4, RNA5, RNA6, and RNA7 in inoculated  
720 *Arabidopsis* and *N. benthamiana*. Virus infected rose plants taken from field samples were  
721 used as a positive control in these experiments.

722

723 FIG. 7. *N. benthamiana* infected with 4R2-iLOV, 7R2-iLOV and 7R5-iLOV.

724 (A) Diagrammatic representation of iLOV fused to ORF2 on RNA2 and introduced into  
725 RNA5 replacing the ORF5.

726 (B) Images of plants at 25 dpi that are mock inoculated or systemically infected with RRV  
727 4R2-iLOV and 7R2-iLOV. Epifluorescence microscope images of infected leaves at 13 dpi  
728 shows fluorescence in epidermal cells. Bars= 100 µm.

729 (C) Images of plants at 25 and 35 dpi that are mock inoculated or systemically infected with  
730 RRV 7R5-iLOV. Epifluorescence microscope images of infected leaves at 13 dpi shows  
731 fluorescence in epidermal cells. Bars= 100 µm.

732 (D) RT-PCR diagnostic using agRRV4-F1/R1 primer set to identify infected samples. PCR  
733 primers detecting EF1 as internal control showing equal loading in each lane. L=1 kb ladder.

734 (E) RT-PCR detecting each viral segment identified on the left. Samples infected with 4R2-  
735 iLOV, 7R2-iLOV and 7R5-iLOV are identified above the gels. EF-1 is a control PCR showing  
736 equal loading in each lane.

737

738 Supplemental Fig 1.

739 RT PCR detection of each RRV segment using RNA from systemically infected leaves. Lane 1  
740 is mock (M), lanes 2 and 3 are Knockout® roses, and lanes 4 and 5 are Double Knockout®  
741 roses.

**Table 1 Total proportion of systemically infected plants confirmed at 25 dpi by RT PCR using agRRV4 F1/R1 primer set**

| Constructs                                                                   | <i>Arabidopsis</i> | <i>N. benthamiana</i> | Knock Out® roses   | Double Knock Out® roses |
|------------------------------------------------------------------------------|--------------------|-----------------------|--------------------|-------------------------|
| Rose sap inoculated plants <sup>a</sup>                                      | 13/18              | 12/12                 |                    |                         |
| Buffer treated <sup>a</sup>                                                  | 0/8                | 0/8                   |                    |                         |
| pCB301 <sup>b</sup>                                                          | 0/12               | 0/12                  | 1/4                | 4/4                     |
| RRV1-7 <sup>b</sup>                                                          | 11/12              | 17/18                 | 12/12 <sup>d</sup> | 7/8 <sup>d</sup>        |
| RRV1-4 <sup>b</sup>                                                          | 10/12              | 16/18                 |                    |                         |
| RRV1-4GFP <sup>b</sup>                                                       | 5/12               | 21/21                 |                    |                         |
| RRV1-7GFP <sup>b</sup>                                                       | 6/12               | 21/21                 |                    |                         |
| 4R2-iLOV                                                                     |                    | 8/8                   |                    |                         |
| 7R2-iLOV                                                                     |                    | 8/8                   |                    |                         |
| 7R5-iLOV                                                                     |                    | 8/8                   |                    |                         |
| RRV1-7-Nb sap inoculated plants <sup>c</sup>                                 | 2/6                |                       |                    |                         |
| Buffer treated plants alongside RRV1-7-Nb sap inoculated plants <sup>c</sup> | 0/3                |                       |                    |                         |

<sup>a</sup> The proportion of infected *Arabidopsis* plants were pooled from two experiments and the proportion of infected *N. benthamiana* were from one experiment.

<sup>b</sup> The proportion of infected *Arabidopsis* plants were pooled from three experiments and the proportion of infected *N. benthamiana* were pooled from two experiments. Rose plants have been prescreened for no infected ones for further infectious clone treatments. All plants were assayed by RT-PCR at 25 dpi

<sup>c</sup> The proportion of *Arabidopsis* plants that were identified at 25 dpi to be infected following inoculation with sap taken from RRV1-7 *N. benthamiana* plants (also at 25 dpi) or buffer.

<sup>d</sup> Knock Out® roses, can detect RRV infection in new emerging leaves at 30 dpi and in double knockout detects 40 dpi.

**Table 2 Infection characteristics in Arabidopsis**

|                                                                  | <b>pCB301 mock</b>           | <b>RRV seg 1-4</b>           | <b>RRV seg 1-7</b>           |
|------------------------------------------------------------------|------------------------------|------------------------------|------------------------------|
| Inflorescence emergence (days)                                   | 59                           | 45                           | 45                           |
| Proportion of total plants with lateral inflorescence branches   | 2/4                          | 6/6                          | 6/6                          |
| Proportion of total plants with secondary inflorescence branches | 2/4                          | 6/6                          | 6/6                          |
| Proportion of total plants with tertiary inflorescence branches  | 0/4                          | 6/6                          | 6/6                          |
| Proportion of total plants with aerial Rosettes                  | 3/4 have <10 aerial rosettes | 6/6 have >30 aerial rosettes | 6/6 have >40 aerial rosettes |
| Average Height                                                   | 22.0 cm                      | 51.0 cm                      | 45.0 cm                      |
| Average Number of Siliques/plant                                 | 50 (short)                   | 250 (long)                   | 200 (long)                   |
| 1000 seed weight                                                 | 16 mg                        | 17 mg                        | 18 mg                        |
| Seed germination                                                 | 100%                         | 100%                         | 100%                         |

Representative data from one experiment collected from 4 mock treated plants and 6 RRV infected plants for each category.



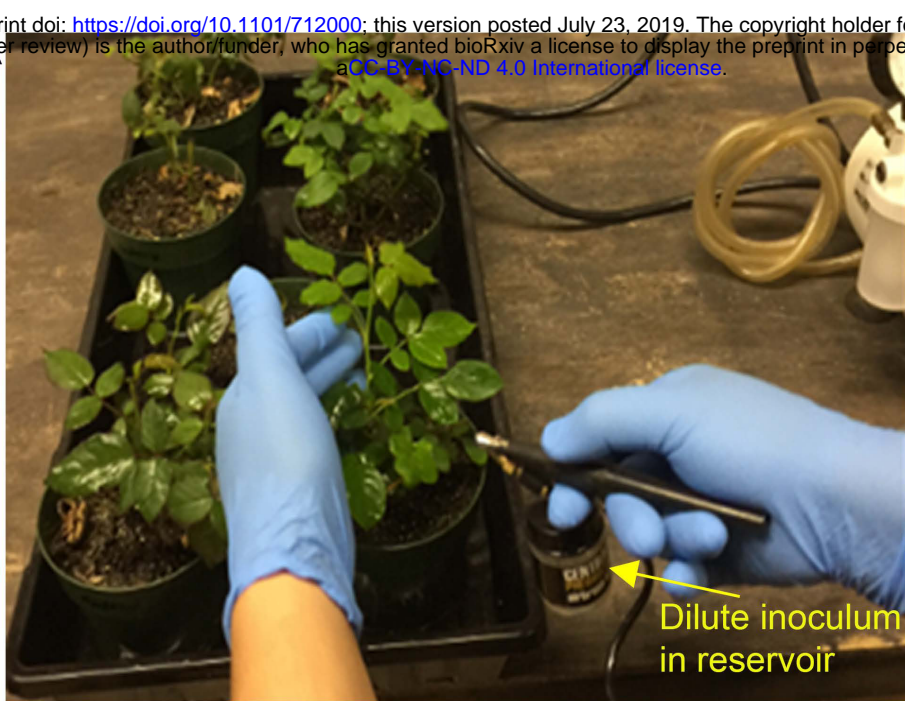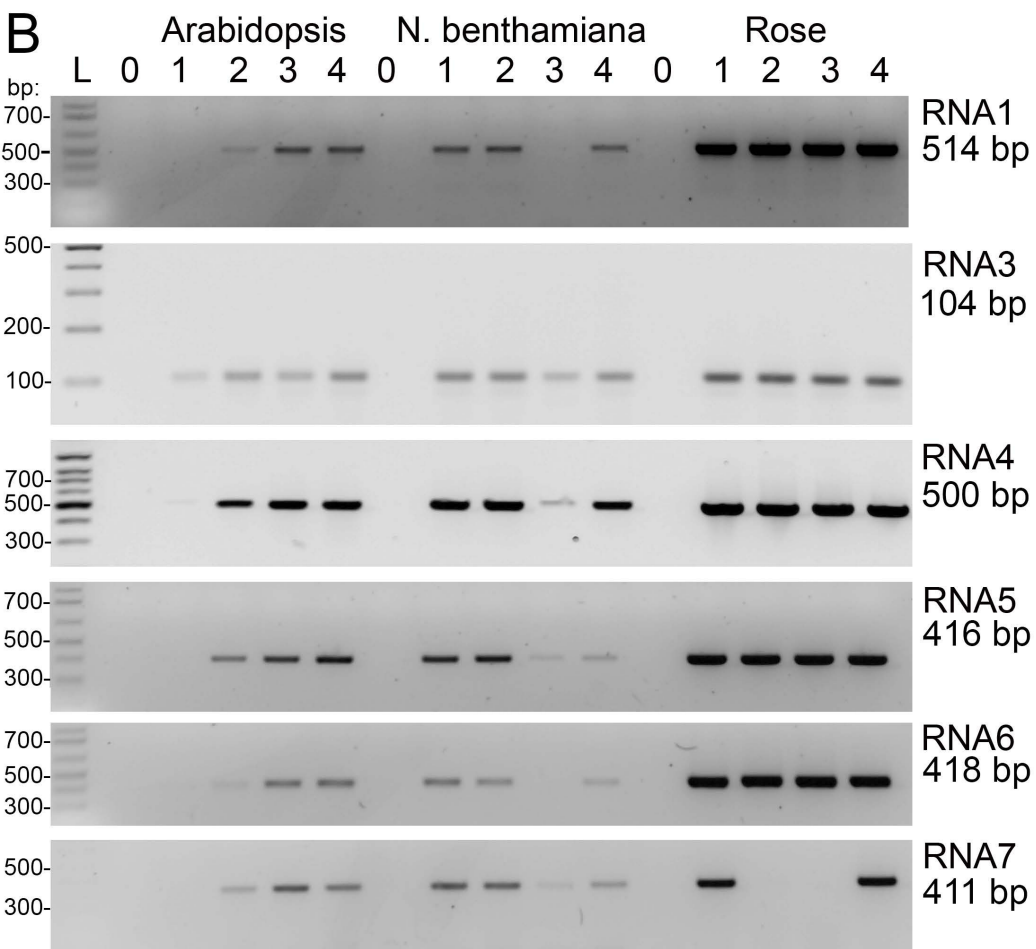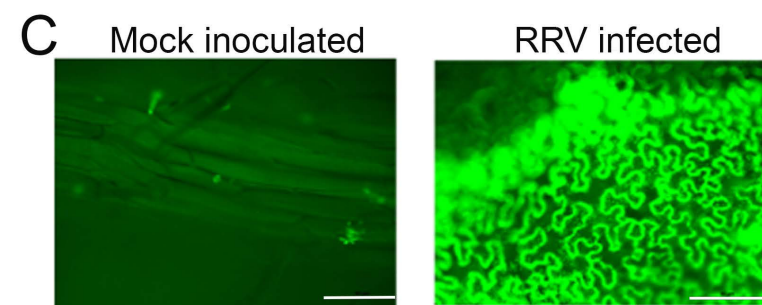

Figure 1

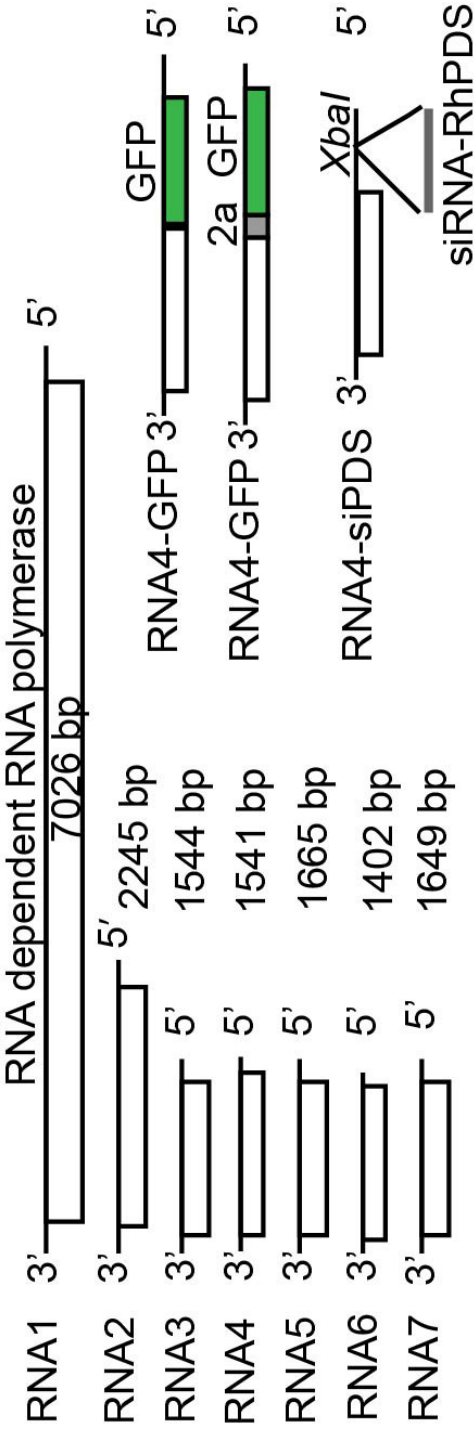

## Binary plasmid pCB301

Transcription start

Ribozyme Cleavage

TTTGGAGAGG → agtagtgaactcccta.....gaacactact GGGTCGGCAT

CaMV 35S agRNA1 5'

agRNA1 3' HDV Ribozyme

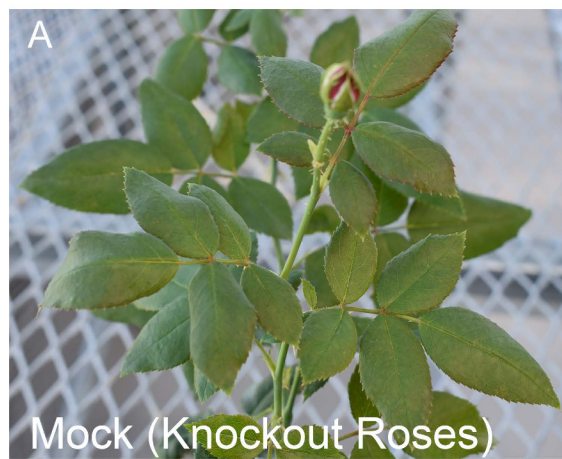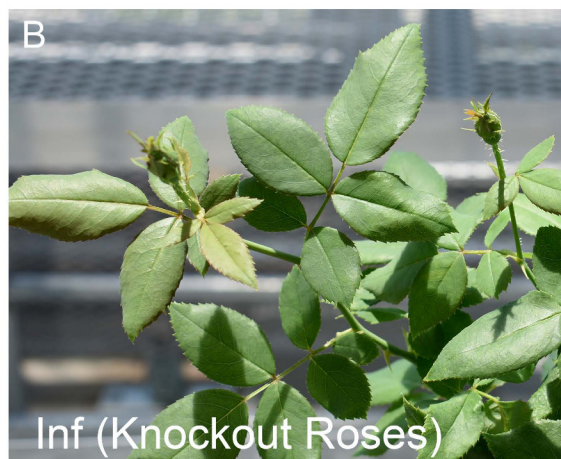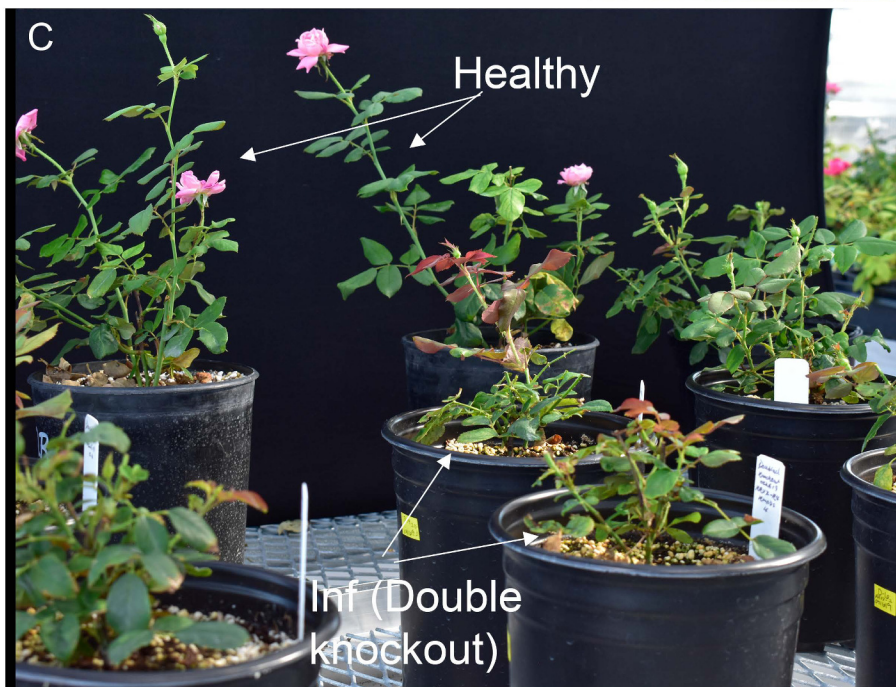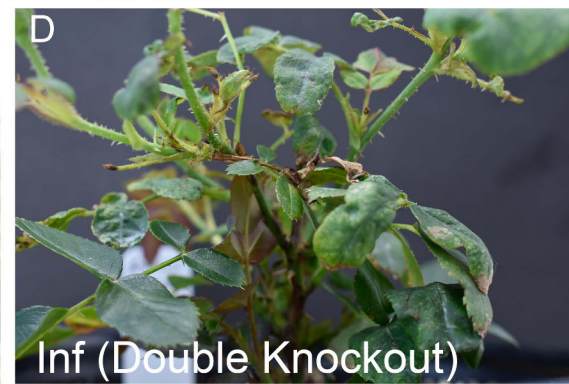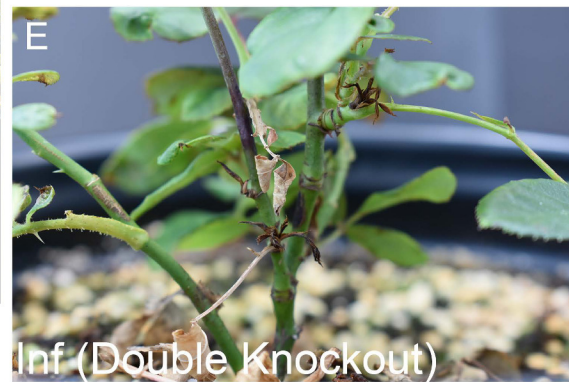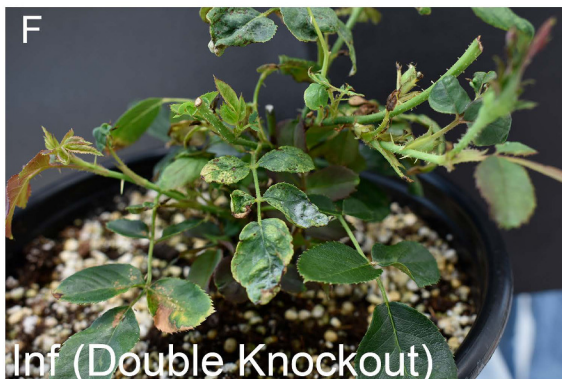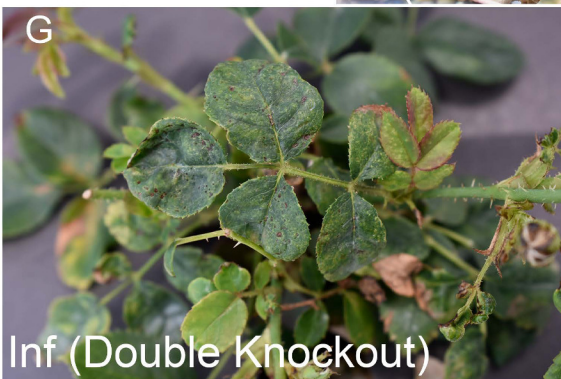

Figure 3

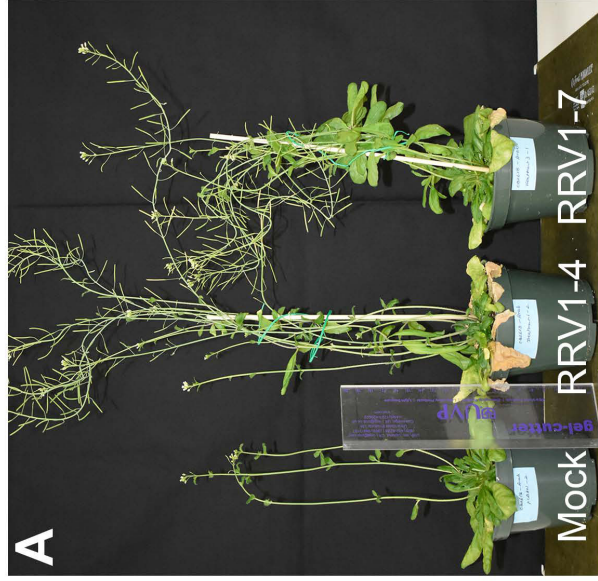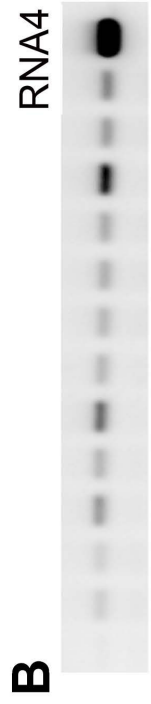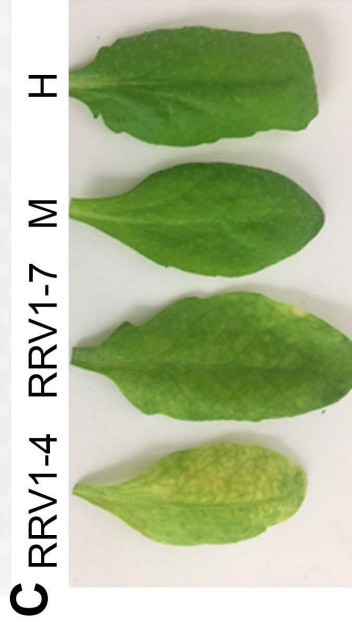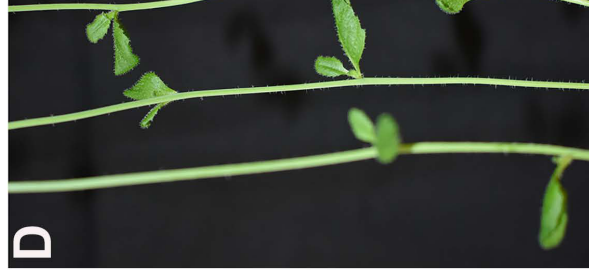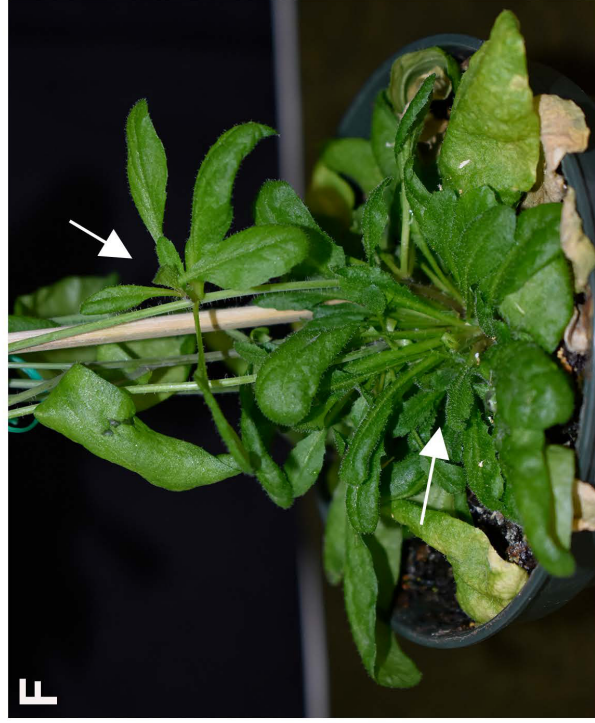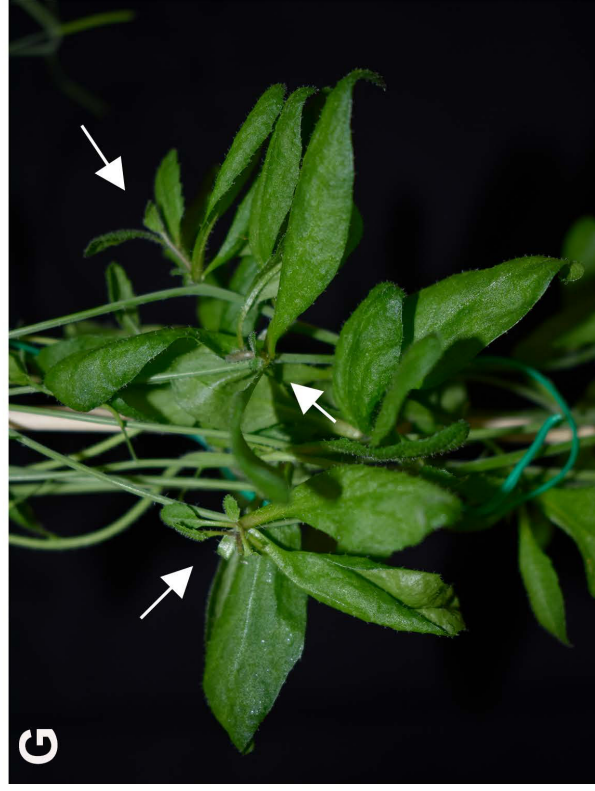

**Figure 4**

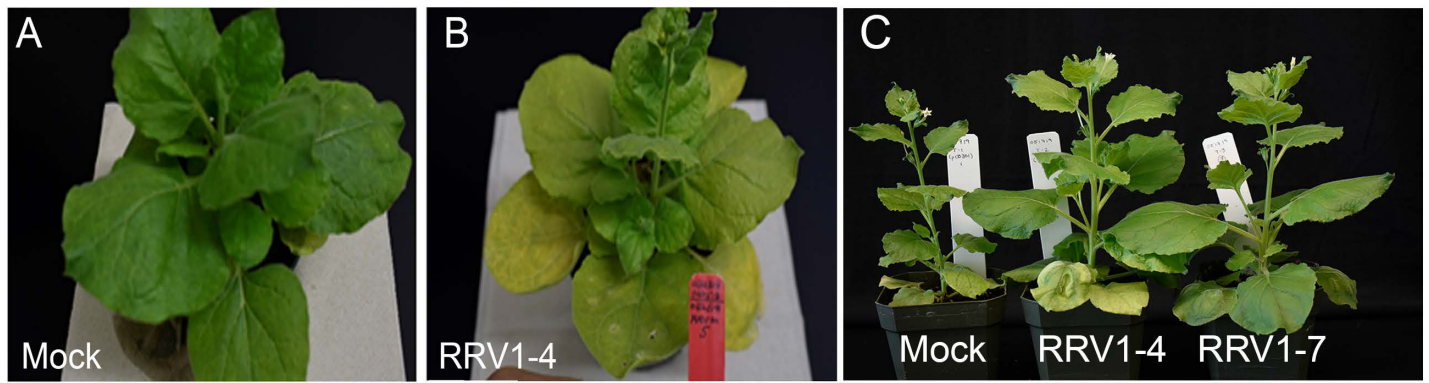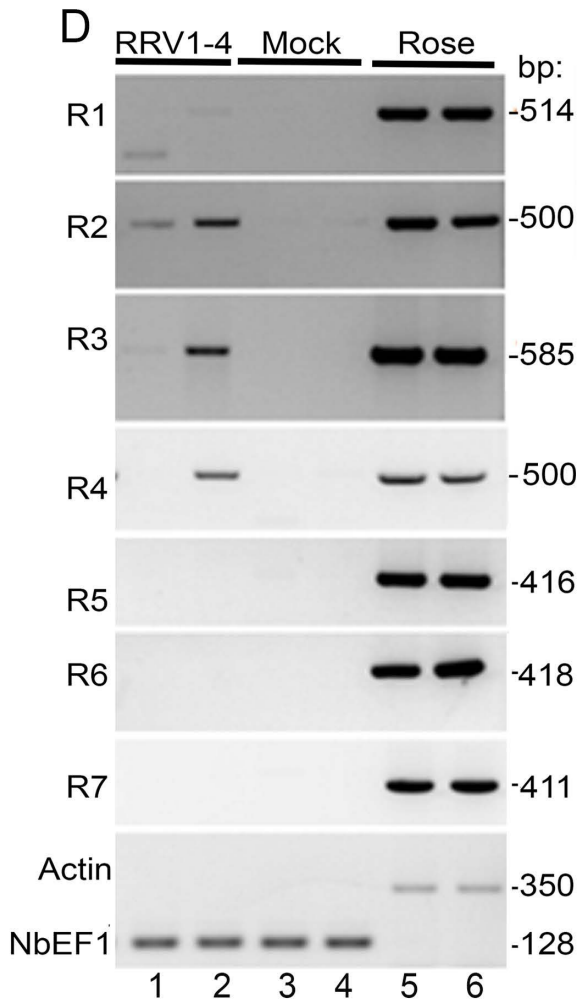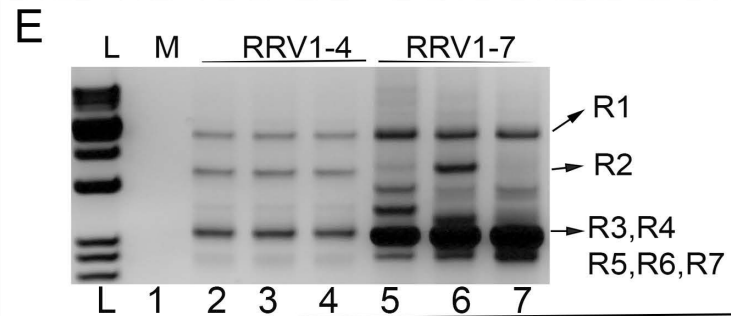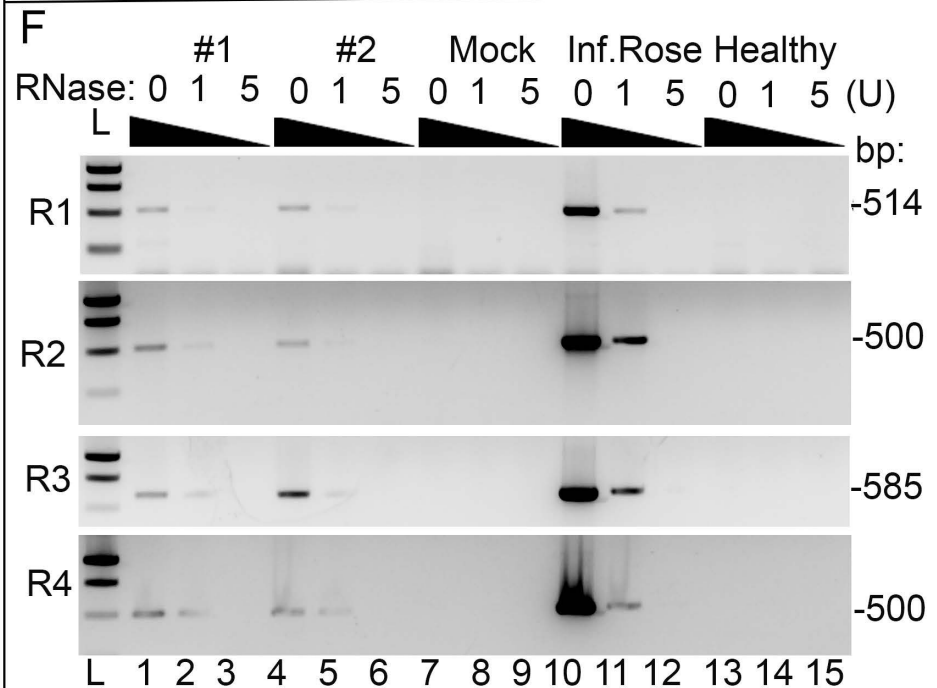

Figure 5

**A**

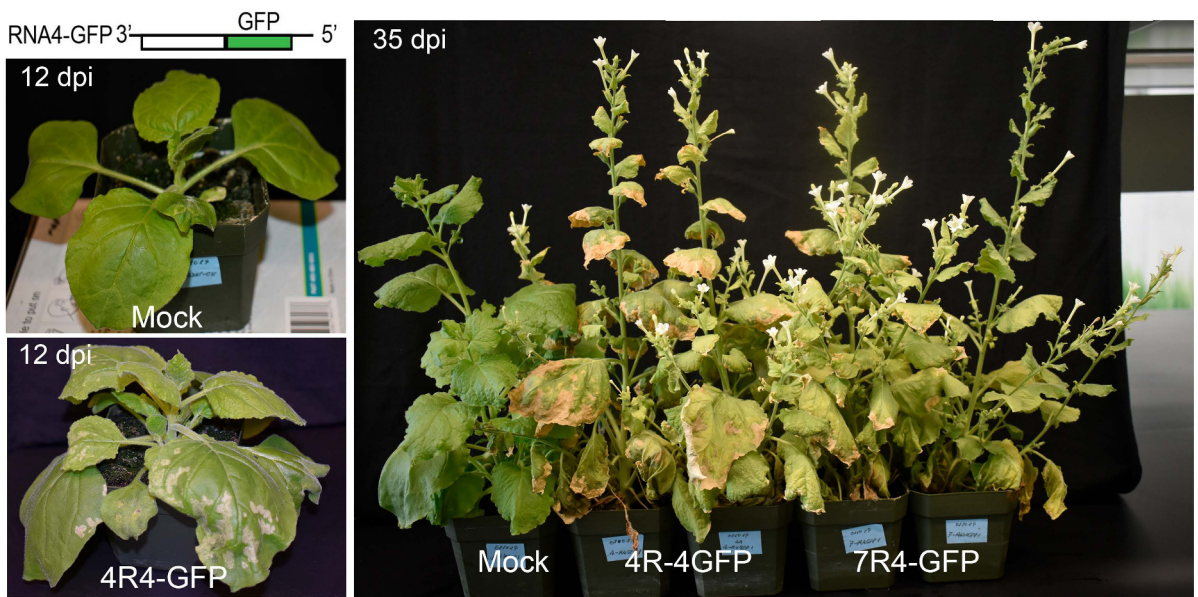

**B**

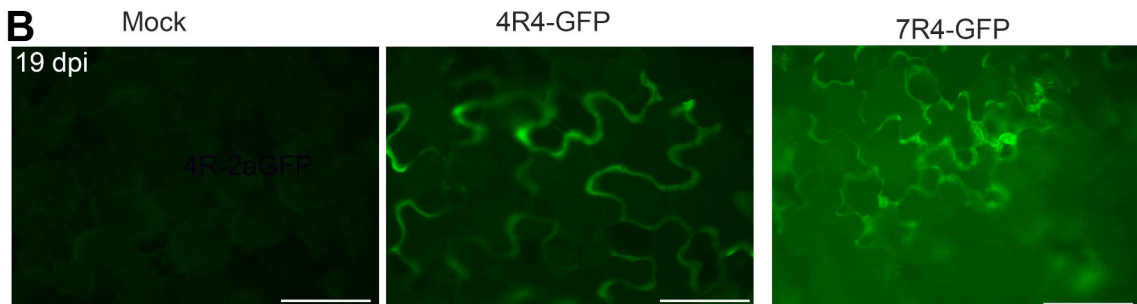

**C**

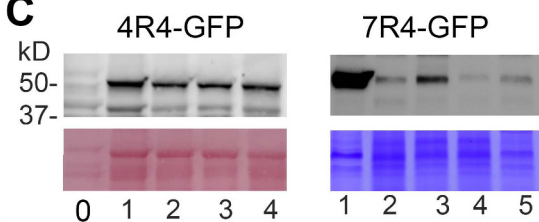

**D**

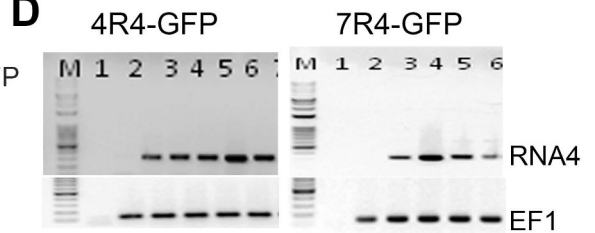

**E**

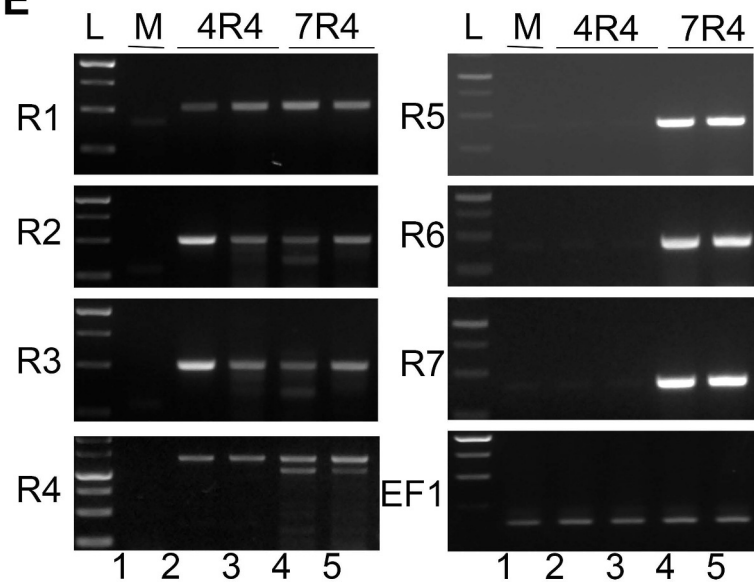

Figure 6

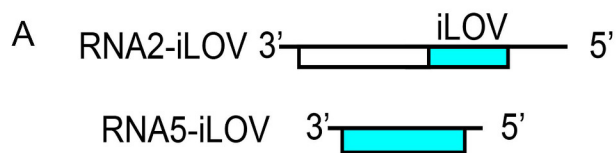

B  
(25 dpi) Mock      4R2-iLOV      7R2-iLOV

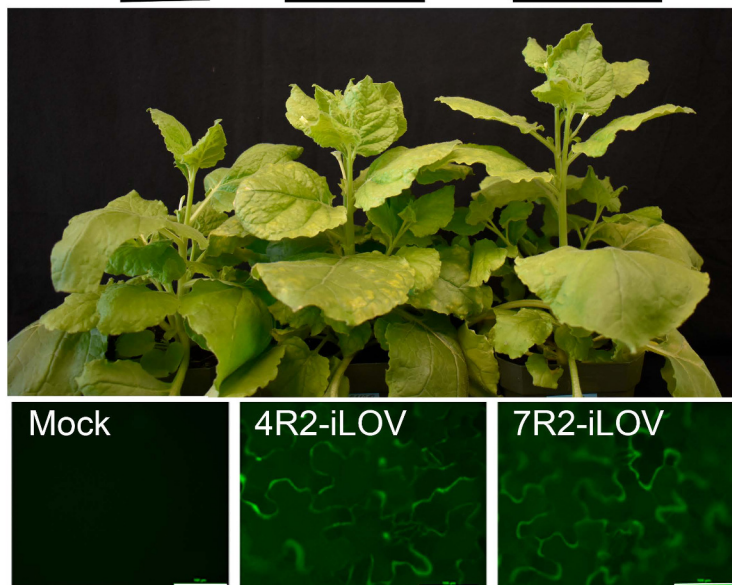

C      Mock      7R5-iLOV (25 dpi)

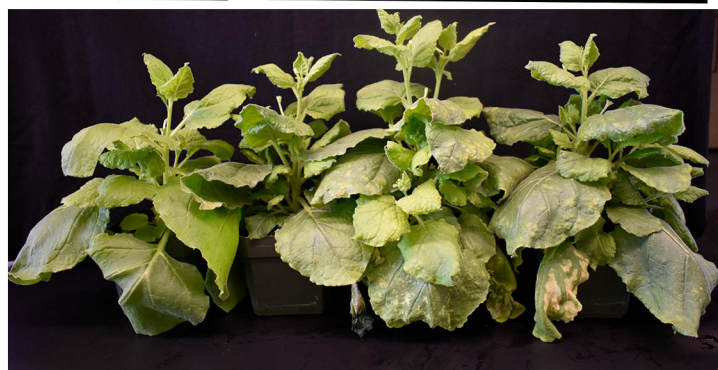

D

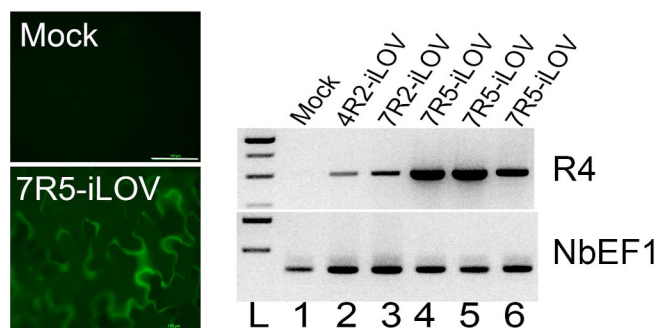

E

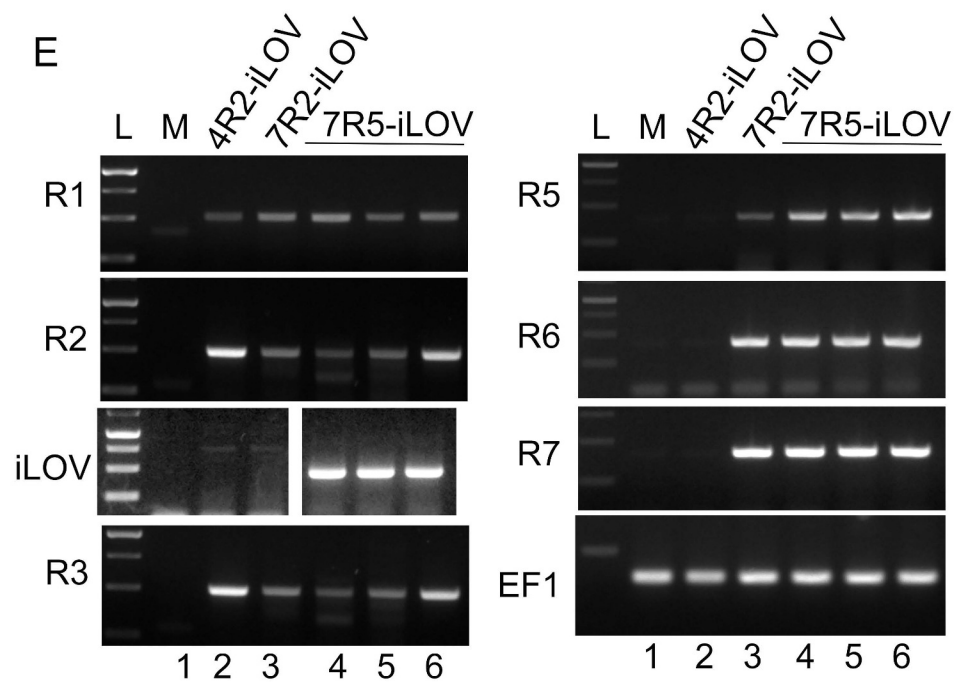

Figure 7
